# Supplementary material for: Volatile tin oxide memristor for neuromorphic computing
Source: PubMed Central journal article supplement — iScience. 2024 Jul 9;27(8):110479. doi: 10.1016/j.isci.2024.110479 (PMC11315111; doi:10.1016/j.isci.2024.110479), 2024-07-09
Supplement: mmc1.pdf [file mmc1.pdf]

**iScience, Volume 27**

**Supplemental information**

**Volatile tin oxide memristor  
for neuromorphic computing**

**Dongyeol Ju and Sungjun Kim**

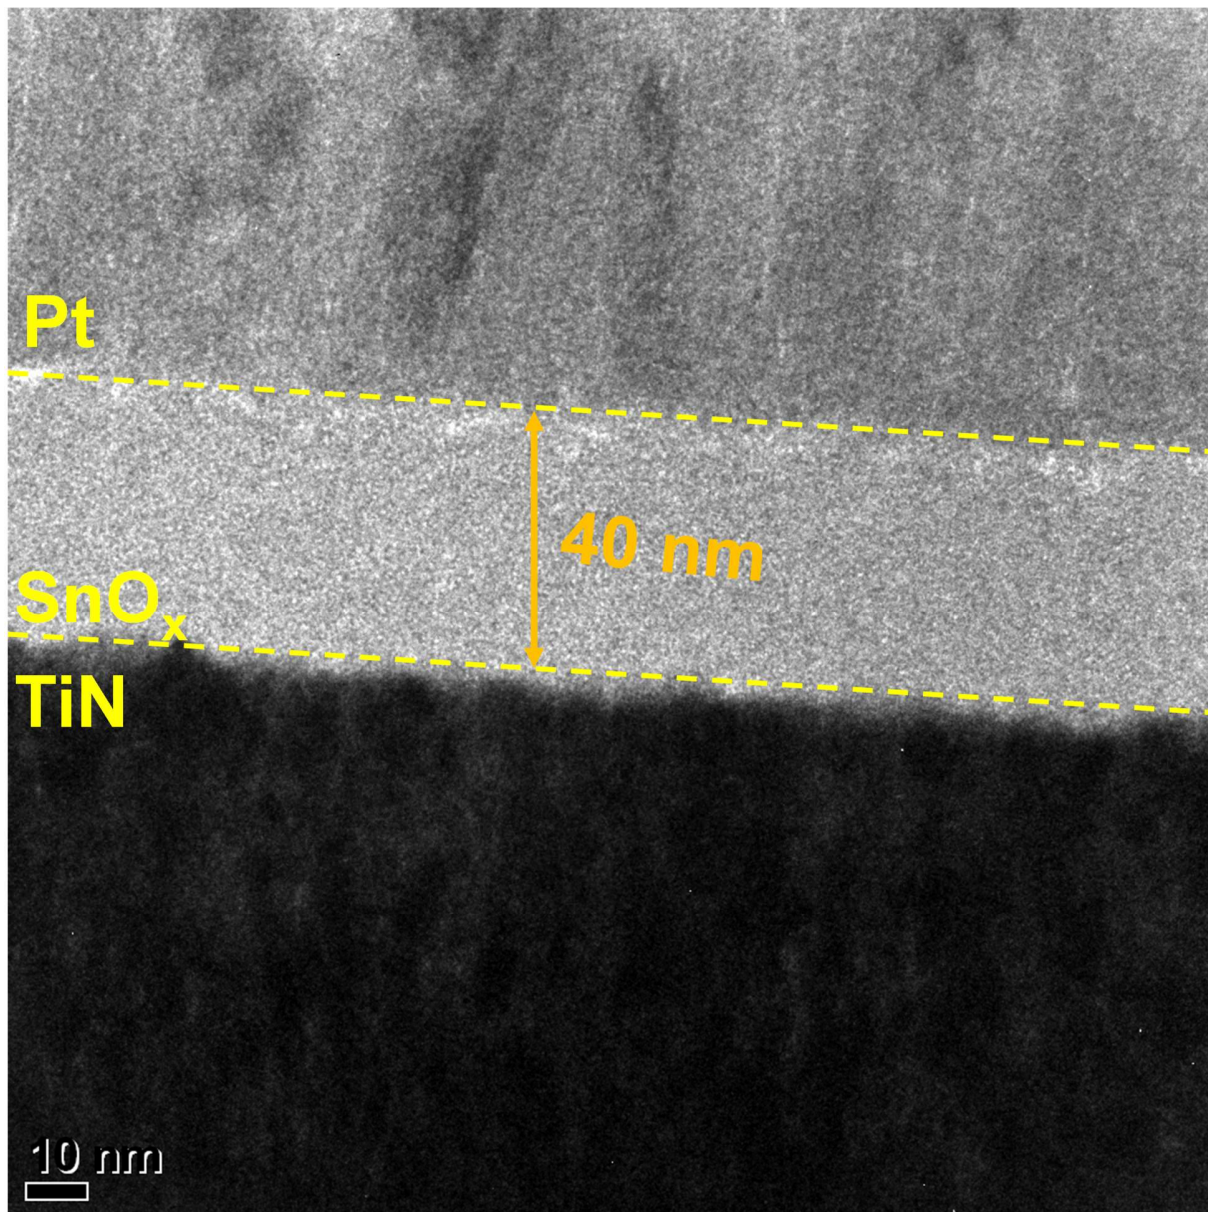

Figure S1. Cross-sectional TEM image of the Pt/SnO<sub>x</sub>/TiN memristor.

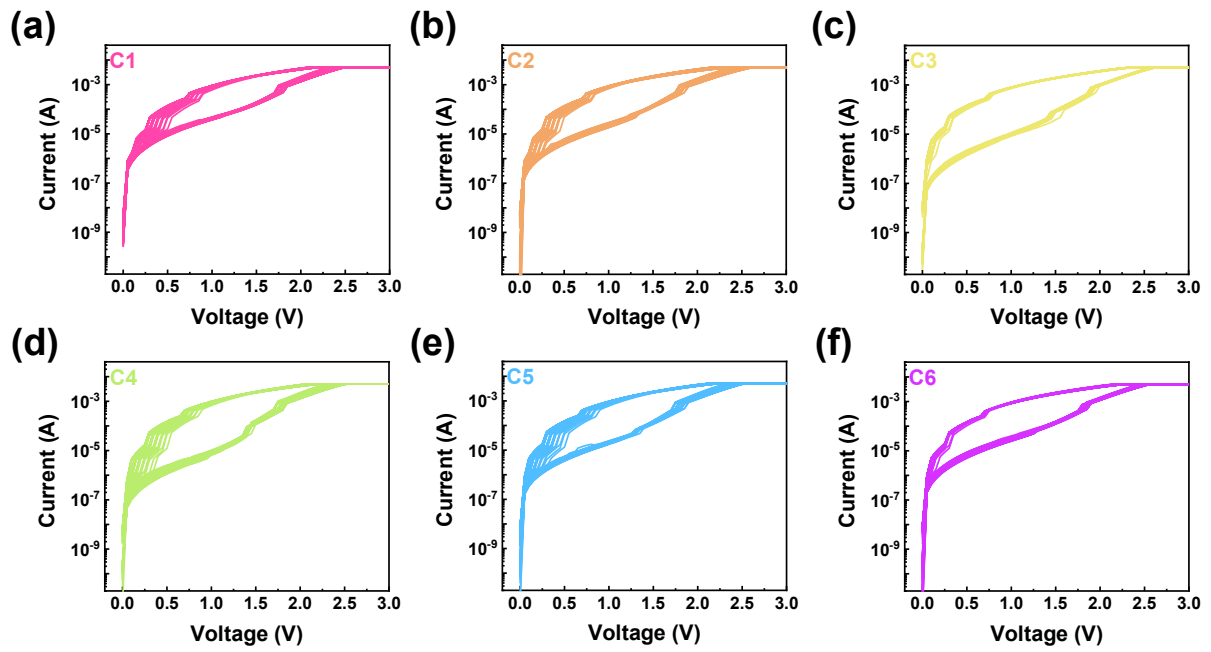

Figure S2. (a)-(f) Cell-to-cell I-V curves of 6 randomly selected cells, each of the representing 100 cycles.

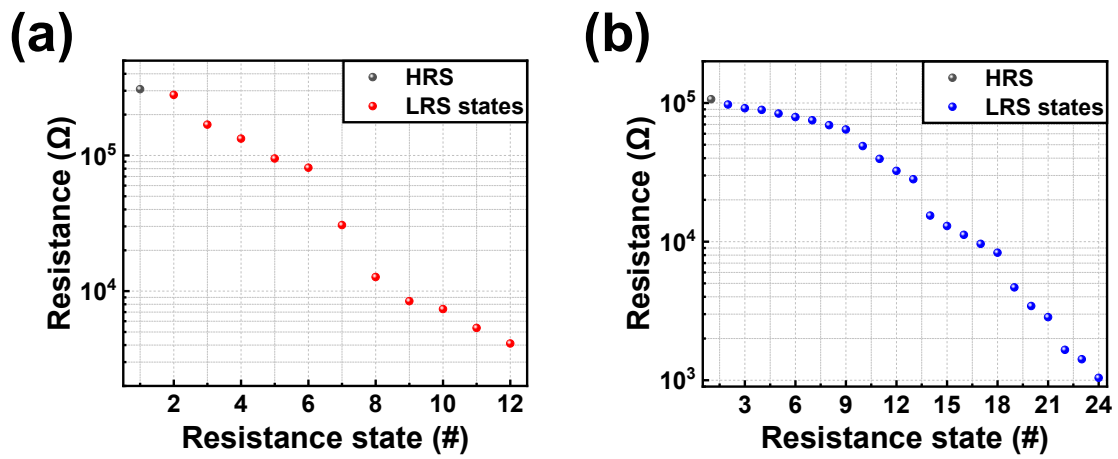

Figure S3. Analyzed HRS and LRS values acquired through varying (a) set bias amplitude, and (b) CC.

(a)

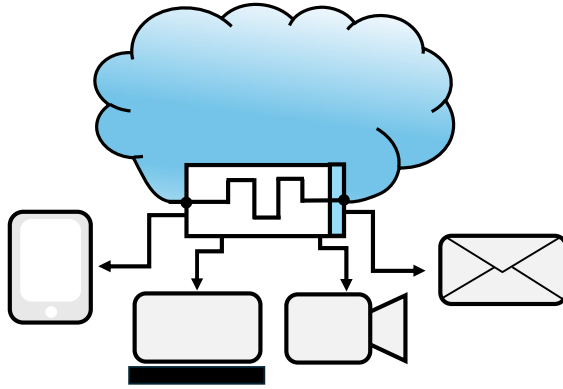

(b)

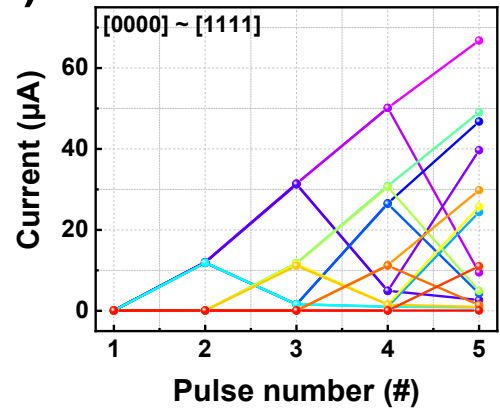

Figure S4. (a) Schematic illustration of the edge computing. (b) 16 states of the 4-bit edge computing, acquired from Pt/SnO<sub>x</sub>/TiN memristor.
